# Supplementary material for: CRISPR/Cas9 editing reveals novel mechanisms of clustered microRNA regulation and function
Source: PubMed Central journal article supplement (PMC5561095; doi:10.1038/s41598-017-09268-0), 2017-08-17

# ONLINE SUPPLEMENT

## CRISPR/Cas9 editing reveals novel mechanisms of clustered microRNA regulation and function

Lazaros Lataniotis<sup>1</sup>, Andreas Albrecht<sup>2</sup>, Fatma O. Kok<sup>3</sup>, Clinton A.L. Monfries<sup>4</sup>, Lorena Benedetti<sup>5</sup>, Nathan D. Lawson<sup>3</sup>, Simon M. Hughes<sup>4</sup>, Kathleen Steinhofel<sup>6</sup>, Manuel Mayr<sup>1</sup> and Anna Zampetaki<sup>1</sup>

1 King's British Heart Foundation Centre, King's College London, UK.

2 Middlesex University, School of Science and Technology, London, UK.

3 University of Massachusetts Medical School, Department of Molecular, Cell, and Cancer Biology, Worcester, USA.

4 King's College London, Randall Division, London, UK.

5 King's College London, Division of Cancer Studies, London, UK.

6 King's College London, Informatics Department, London, UK.

# Supplementary Figure S1

**A** CLUSTAL W (1.83) multiple sequence alignment

|          |                        |          |                             |
|----------|------------------------|----------|-----------------------------|
| miR-15a  | UAGCAGCACAUAAUGGUUUGUG | MiR-497a | CAGCAGCACACUGUGGUUUGU-----A |
| miR-15b  | UAGCAGCACAUCAUGGUUUACA | MiR-497b | ---CACCACAGUGUGGUUUGGACGUGG |
| miR-16-1 | UAGCAGCACGUAAAUAUUGGCG |          | **   **   *****             |
| miR-16-2 | UAGCAGCACGUAAAUAUUGGCG |          |                             |
| miR-195a | UAGCAGCACAGAAAUAUU-GGC |          |                             |
| miR-497a | CAGCAGCACACUGUGGUUUGUA |          |                             |
|          | *****           **     |          |                             |

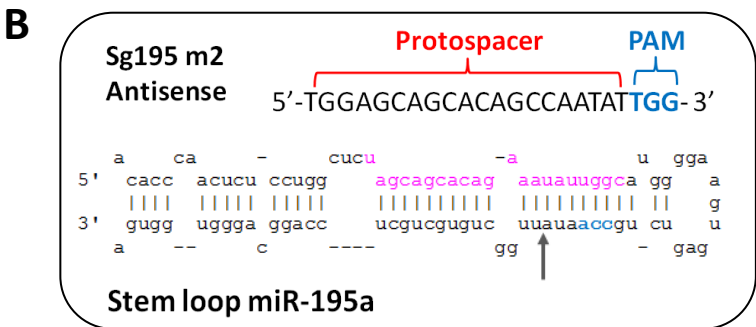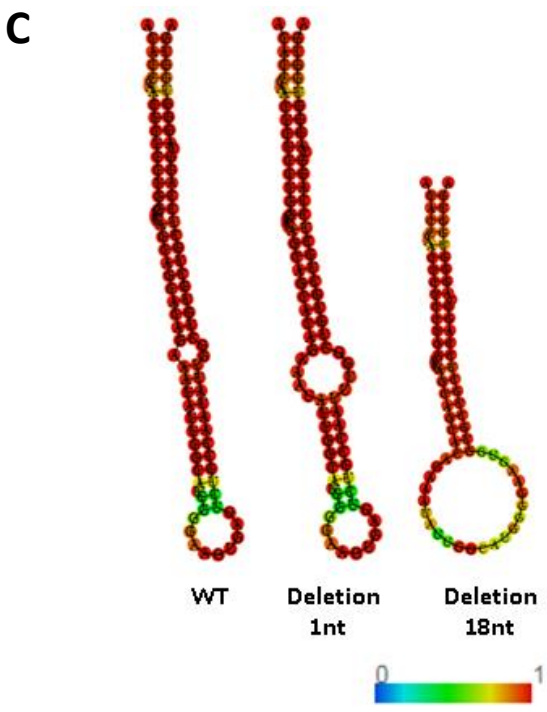

**Supplementary Figure S1. A. Sequence Alignment.** The T-Coffee multiple sequence alignment program was used to compare the mouse miR-15 family members. Right Panel: miR-497a displays high homology with miR-497b. MiR-497b is encoded by the antisense strand of the miR-497a~195 cluster and does not harbour the same seed sequence. **B. Schematic representation of sg195 m2.** The DNA sequence corresponding to the transcript annotated in miRBase v21 as stem loop miRNA was used as input sequence to the CRISPR Design tool. PAM sequence is highlighted in blue. The mature miRNA sequence is highlighted in purple and arrow indicated the site of mutations induced by random indels following editing of the genomic locus in mutant cells. **C. Minimum free energy structure of the miR-195a stem loop loop following sg195m2 editing as assessed by the structure prediction software RNAfold.** The base-pairing probability, as indication of structural remodelling or dynamics, was used for color-coding.

# Supplementary Figure S2

MiR-497a genomic locus (P3+P4)  
Editing: sg195m2

```
wt CCTGCCCCCGCCCCAGCAGCACACTGTGGTTTGTACGGCACTGTGGCCACGTCCAAACCACACTGTGGTGTTAGAGCGAGGGTA
1 CCTGCCCCCGCCCCAGCAGCACACTGTGGTTTGTACGGCACTGTGGCCACGTCCAAACCACACTGTGGTGTTAGAGCGAGGGTA
2 CCTGCCCCCGCCCCAGCAGCACACTGTGGTTTGTACGGCACTGTGGCCACGTCCAAACCACACTGTGGTGTTAGAGCGAGGGTA
3 CCTGCCCCCGCCCCAGCAGCACACTGTGGTTTGTACGGCACTGTGGCCACGTCCAAACCACACTGTGGTGTTAGAGCGAGGGTA
4 CCTGCCCCCGCCCCAGCAGCACACTGTGGTTTGTACGGCACTGTGGCCACGTCCAAACCACACTGTGGTGTTAGAGCGAGGGTA
5 CCTGCCCCCGCCCCAGCAGCACACTGTGGTTTGTACGGCACTGTGGCCACGTCCAAACCACACTGTGGTGTTAGAGCGAGGGTA
6 CCTGCCCCCGCCCCAGCAGCACACTGTGGTTTGTACGGCACTGTGGCCACGTCCAAACCACACTGTGGTGTTAGAGCGAGGGTA
7 CCTGCCCCCGCCCCAGCAGCACACTGTGGTTTGTACGGCACTGTGGCCACGTCCAAACCACACTGTGGTGTTAGAGCGAGGGTA
8 CCTGCCCCCGCCCCAGCAGCACACTGTGGTTTGTACGGCACTGTGGCCACGTCCAAACCACACTGTGGTGTTAGAGCGAGGGTA
9 CCTGCCCCCGCCCCAGCAGCACACTGTGGTTTGTACGGCACTGTGGCCACGTCCAAACCACACTGTGGTGTTAGAGCGAGGGTA
10 CCTGCCCCCGCCCCAGCAGCACACTGTGGTTTGTACGGCACTGTGGCCACGTCCAAACCACACTGTGGTGTTAGAGCGAGGGTA
*****
```

**Supplementary Figure S2. Clustal alignment of Sanger sequencing of the miR-497a stem loop locus following sg195m2 editing in VSMCs.** Wt: unedited cells, 1-10 randomly picked individual colonies harboring genomic PCR amplicons from sg195m2 edited VSMCs. P3, P4: Genomic PCR primers.

# Supplementary Figure S3

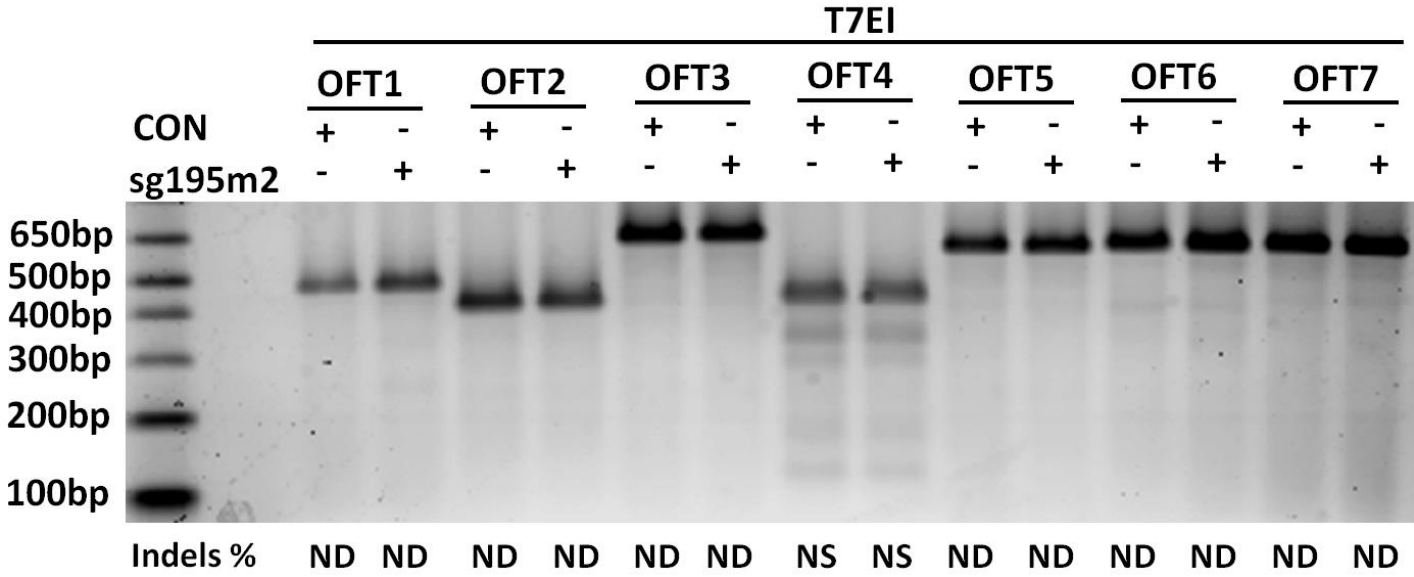

**Supplementary Figure S3. Sg195 m2 OFFTARGETS.** T7EI assessment of gene editing in the loci of putative OFFTARGET sites for sg195 m2 as predicted by the CRISPR design tool (Zhang Lab, MIT) and CRISPR Finder (Wellcome Trust Sanger Institute). OFT; OFFTARGET, ND: Non Detectable, NS: Non Specific.

# Supplementary Figure S4

## A miR-497~195 cluster chr11

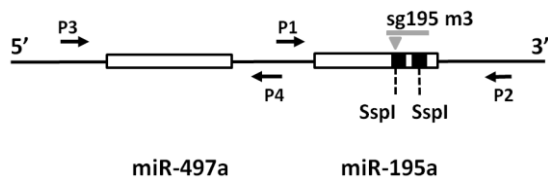

## B

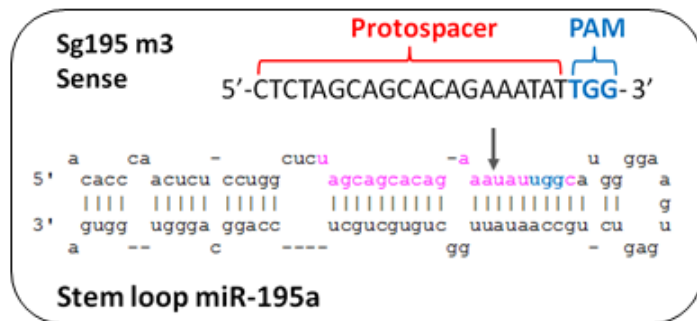

## C

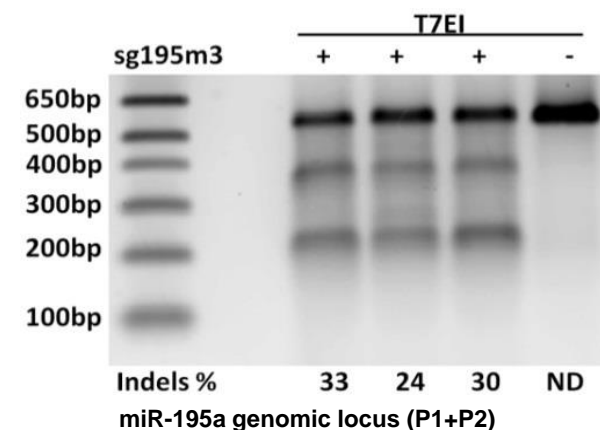

## D

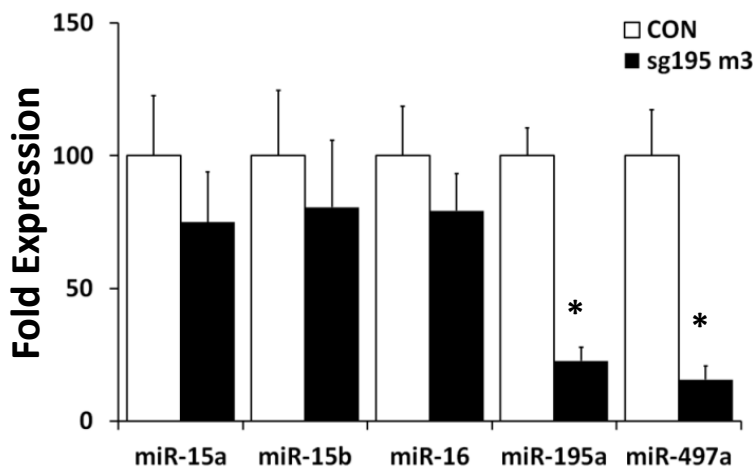

## E MiR-195a genomic locus (P1+P2)

Editing: sg195m3

|    | TARGET                                               | DELETION SIZE (bp) | INSERTION SIZE (bp) |
|----|------------------------------------------------------|--------------------|---------------------|
| wt | ACACCCAACCTCTCCTGGCTCTAGCAGCACAGAAATATTGGCATGGGGAA   |                    |                     |
| mt | ACACCCAACCTCTCCTGGCTCTAGCAGCACAGAAATA-TGGCATGGGGAA   | 1                  | N/A                 |
| mt | ACACCCAACCTCTCCTGGCTCTAGCAGCACAGAAA-ATTGGCATGGGGAA   | 1                  | N/A                 |
| mt | ACACCCAACCTCTCCTGGCTCTAGCAGCACAG----ATATTGGCATGGGGAA | 2                  | N/A                 |
| mt | ACACCCAACCTCTCCTGGCTCTAGCAGCAC-----AcTATTGGCATGGGGAA | 2                  | 1                   |
| mt | ACACCCAACCTCTCCTGGCTCTAGCAGCAC-----AATATTGGCATGGGGAA | 3                  | N/A                 |
| mt | ACACCCAACCTCTCCTGGCTCTAGCAGCAC-----ATATTGGCATGGGGAA  | 4                  | N/A                 |
| mt | ACACCCAACCTCTCCTGGCTCTAG-----GCATGGGGAA              | 16                 | N/A                 |
| mt | ACACCCAACCTCTCCTGGCTC-----TTGGCATGGGGAA              | 16                 | N/A                 |

**Supplementary Figure S4. Gene editing of the miR-195a locus using sgRNA195 m3. A. The genomic locus of the miR-497~195 cluster. B. Schematic representation of sg195 m3. The DNA sequence corresponding to the transcript annotated in miRBase v21 as stem loop miRNA was used as input sequence to the CRISPR Design tool. PAM sequence is highlighted in blue. The mature miRNA sequence is highlighted in purple and arrow indicated the site of mutations induced by random indels following editing of the genomic locus in mutant cells. C. T7EI assay for the miR-195a locus following editing with sg195m3. ND: Non detectable. P1, P2: Genomic PCR primers. D. Gene editing of the miR-195a locus resulted in the down-regulation of both miR-195a and miR-497a without affecting the expression of other members of the miR-15 family as assessed by qPCR. U6 was used as a normalization control. n=4, \* p<0.05. E. Sanger sequencing of the sg195 m3 edited miR-195a genomic locus. The presence of random indels, mainly deletions was detected and represented as dashes. The PAM sequence is highlighted in grey. Insertions are shown in bold small case fonts. N/A: Not Applicable.**

# Supplementary Figure S5

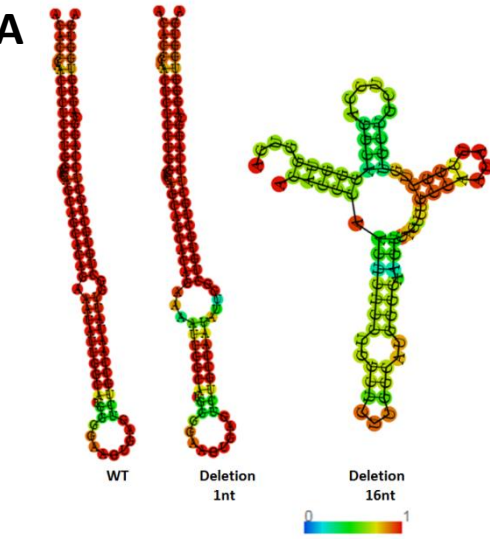

**B** MiR-497a genomic locus (P3+P4)  
Editing: sg195m3

```

wt  CCTGCCCCCGCCCCAGCAGCACACTGTGGTTTGTACGGCACTGTGGCCACGTCCAAACCACACTGTGGTGTAGAGCGAGGGTA
1   CCTGCCCCCGCCCCAGCAGCACACTGTGGTTTGTACGGCACTGTGGCCACGTCCAAACCACACTGTGGTGTAGAGCGAGGGTA
2   CCTGCCCCCGCCCCAGCAGCACACTGTGGTTTGTACGGCACTGTGGCCACGTCCAAACCACACTGTGGTGTAGAGCGAGGGTA
3   CCTGCCCCCGCCCCAGCAGCACACTGTGGTTTGTACGGCACTGTGGCCACGTCCAAACCACACTGTGGTGTAGAGCGAGGGTA
4   CCTGCCCCCGCCCCAGCAGCACACTGTGGTTTGTACGGCACTGTGGCCACGTCCAAACCACACTGTGGTGTAGAGCGAGGGTA
5   CCTGCCCCCGCCCCAGCAGCACACTGTGGTTTGTACGGCACTGTGGCCACGTCCAAACCACACTGTGGTGTAGAGCGAGGGTA
6   CCTGCCCCCGCCCCAGCAGCACACTGTGGTTTGTACGGCACTGTGGCCACGTCCAAACCACACTGTGGTGTAGAGCGAGGGTA
7   CCTGCCCCCGCCCCAGCAGCACACTGTGGTTTGTACGGCACTGTGGCCACGTCCAAACCACACTGTGGTGTAGAGCGAGGGTA
8   CCTGCCCCCGCCCCAGCAGCACACTGTGGTTTGTACGGCACTGTGGCCACGTCCAAACCACACTGTGGTGTAGAGCGAGGGTA
9   CCTGCCCCCGCCCCAGCAGCACACTGTGGTTTGTACGGCACTGTGGCCACGTCCAAACCACACTGTGGTGTAGAGCGAGGGTA
10  CCTGCCCCCGCCCCAGCAGCACACTGTGGTTTGTACGGCACTGTGGCCACGTCCAAACCACACTGTGGTGTAGAGCGAGGGTA
*****
  
```

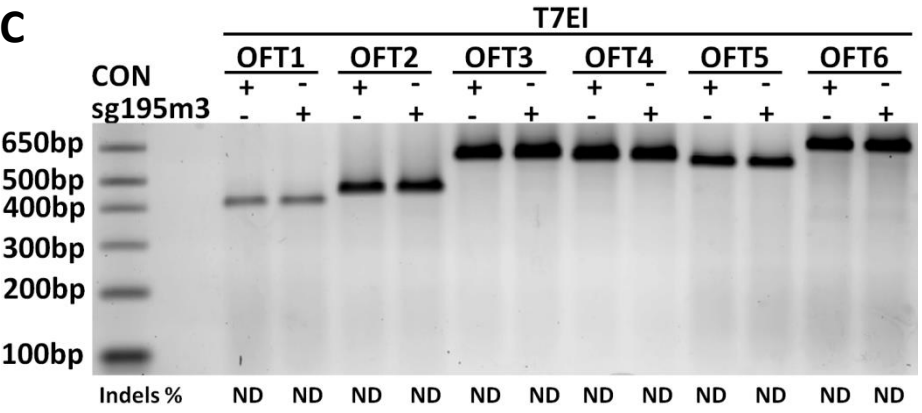

**Supplementary Figure S5. Gene editing of the miR-195a locus using sgRNA195 m3. A. Minimum free energy structure of the miR-195a stem loop following sg195m3 editing as assessed by the structure prediction software RNAfold. The base-pairing probability, as indication of structural remodelling or dynamics, was used for color-coding. B. Clustal alignment of Sanger sequencing of the miR-497a stem loop locus following sg195m3 editing in VSMCs. Wt: unedited cells, 1-10 randomly picked individual colonies harboring genomic PCR amplicons from sg195m2 edited VSMCs. P3, P4: Genomic PCR primers. C. Sg195 m3 OFFTARGETS. T7EI assessment of gene editing in the loci of putative OFFTARGET sites for sg195 m3 as predicted by the CRISPR design tool (Zhang Lab, MIT) and CRISPR Finder (Wellcome Trust Sanger Institute). OFT; OFFTARGET, ND: Non Detectable.**

# Supplementary Figure S6

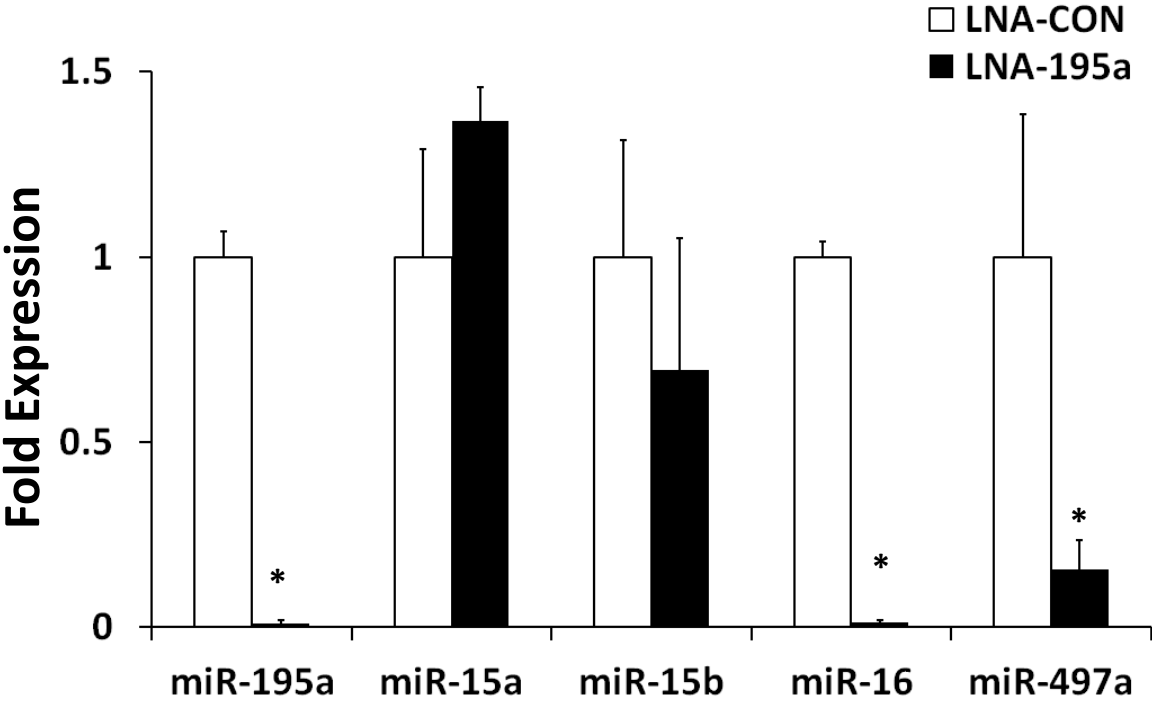

**Supplementary Figure S6. QPCR quantification of miRNA expression following miR-195 inhibition.** U6 was used as a normalization control. LNA-CON: control LNA oligonucleotide, LNA-195a: LNA anti-miR targeting miR-195a. N=3, \* p<0.05

# Supplementary Figure S7

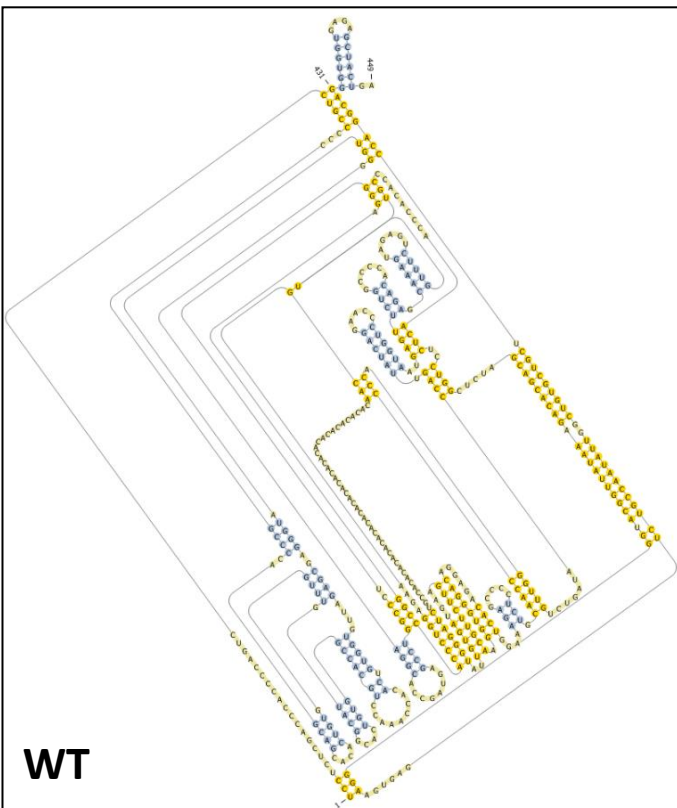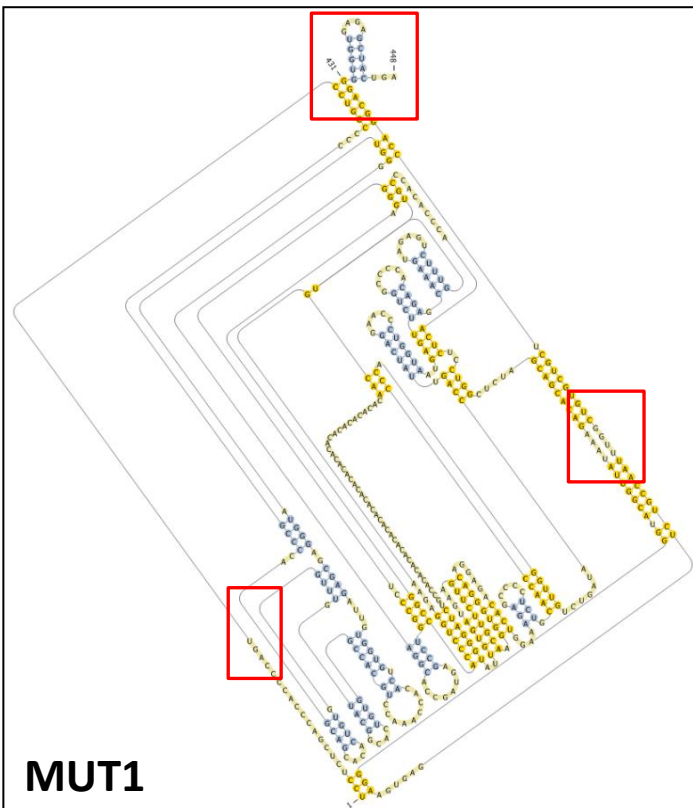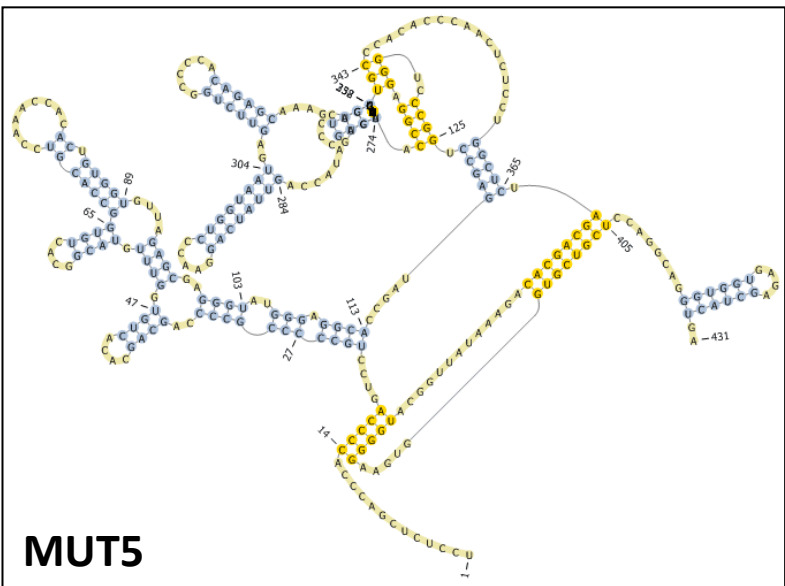

**Supplementary Figure S7. Secondary structures with pseudoknots.** Generated by vsfold5 (Chiba Institute of Technology, Japan): <http://www.rna.it-chiba.ac.jp/~vsfold/vsfold5/> (Settings: 37°C temperature; Kuhn length 6; Jacobson-Stockmayer gamma = 1.75; contiguous stems = 6). WT: unedited cells, MUT1: mutated cells harbouring a 1 nt deletion in miR-195a stem loop, MUT5: mutated cells harbouring a 18nt deletion in the miR-195a stem loop. Red rectangulars in MUT1 highlight differences from WT.



# Supplementary Figure S8

## WT, L=449

### SS without pseudoknots:

```
..(((((((.....)))))).....
```

### SS with pseudoknots:

```
[[[.....]]].....
```

>miR-497 nt pos: 21 – 104 atom pos: 627-3318  
>miR-195a-WT nt pos: 346 – 439 atom pos: 11068-14088

## MUT1, L=448

### SS without pseudoknots:

```
..(((((((.....)))))).....
```

### SS with pseudoknots:

```
[[[.....]]].....
```

>miR-497 nt pos: 21 – 104 atom pos: 627-3318  
>miR-195-MUT1 nt pos: 346 – 438 atom pos: 11068-14055

## MUT5, L= 431

### SS without pseudoknots:

```
..(((((((.....)))))).....
```

### SS with pseudoknots:

```
[[[.....]]].....
```

>miR-497 nt pos: 21 - 104 atom pos: 627 - 3318  
>miR-195-MUT5 nt pos: 346 – 421 atom pos: 11068 - 13516

**Supplementary Figure S8. The optimal secondary structure in dot-bracket notation.** Data were generated by vsfold5 (Chiba Institute of Technology, Japan): <http://www.rna.it-chiba.ac.jp/~vsfold/vsfold5/> (Settings: 37°C temperature; Kuhn length 6; Jacobson-Stockmayer gamma = 1.75; contiguous stems = 6). WT: unedited cells, MUT1: mutated cells harbouring a 1 nt deletion in miR-195a stem loop, MUT5: mutated cells harbouring a 18nt deletion in the miR-195a stem loop. L: length, atom pos: atomic position. A base pair between base i and j is represented by a '(' at position i and a ')' at position j, unpaired bases are represented by dots (Vienna RNA package). Grouping of base positions are represented as [ ].

# Supplementary Figure S9

**Supplementary Figure S9. Reconstruction movie of the tertiary structure of the pri-miR-497~195.** WT: unedited cluster, MUT1: mutated cluster harbouring a 1 nt deletion in miR-195a stem loop, MUT5: mutated cells harbouring a 18nt deletion in the miR-195a stem loop.

<https://nms.kcl.ac.uk/kks/projects/SREP-17-12031.php>

Username: cluster

Password: 195497

# Supplementary Figure S10

## A CLUSTAL W (1.83) multiple sequence alignment

```

miR-143      --UGAGAUGAAGCACUGUAGCUC
miR-145a    GUCCAGUUUCCAGGAAUCCCU
              ** *      **      *
  
```

## B

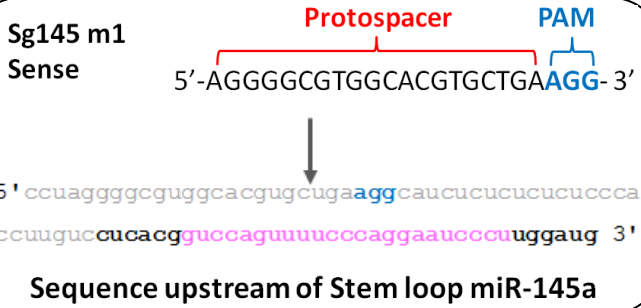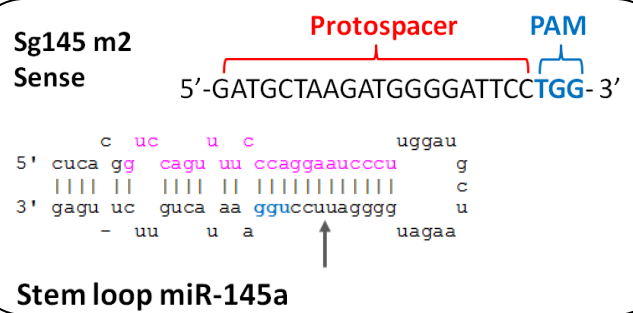

## C

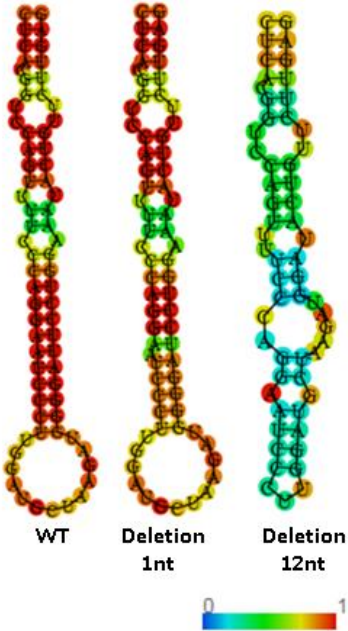

**Supplementary Figure S10. A. Sequence Alignment.** The T-Coffee multiple sequence alignment program was used to compare the miRNAs located in the mouse miR-143~145 cluster. **B. Schematic representation of sg145 m1 and sg145 m2.** The DNA sequence corresponding to the transcript annotated in miRBase v21 as stem loop miRNA and upstream sequences were used as input to the CRISPR Design tool. PAM sequence is highlighted in blue. The mature miRNA sequence is highlighted in purple and the arrow indicates the site of mutations **C. Minimum free energy structure of the miR-145a stem loop as assessed by the structure prediction software RNAfold.** The base-pairing probability, as indication of structural remodelling or dynamics, was used for color-coding.

# Supplementary Figure S11

## MiR-143 genomic locus (P5+P6)

Editing: sg145m1

```
wt CCTGAGGTGCAGTGCTGCATCTCTGGTCAGTTGGGAGTCTGAGATGAAGCACTGTAGCTCAGG
1  CCTGAGGTGCAGTGCTGCATCTCTGGTCAGTTGGGAGTCTGAGATGAAGCACTGTAGCTCAGG
2  CCTGAGGTGCAGTGCTGCATCTCTGGTCAGTTGGGAGTCTGAGATGAAGCACTGTAGCTCAGG
3  CCTGAGGTGCAGTGCTGCATCTCTGGTCAGTTGGGAGTCTGAGATGAAGCACTGTAGCTCAGG
4  CCTGAGGTGCAGTGCTGCATCTCTGGTCAGTTGGGAGTCTGAGATGAAGCACTGTAGCTCAGG
5  CCTGAGGTGCAGTGCTGCATCTCTGGTCAGTTGGGAGTCTGAGATGAAGCACTGTAGCTCAGG
6  CCTGAGGTGCAGTGCTGCATCTCTGGTCAGTTGGGAGTCTGAGATGAAGCACTGTAGCTCAGG
7  CCTGAGGTGCAGTGCTGCATCTCTGGTCAGTTGGGAGTCTGAGATGAAGCACTGTAGCTCAGG
8  CCTGAGGTGCAGTGCTGCATCTCTGGTCAGTTGGGAGTCTGAGATGAAGCACTGTAGCTCAGG
9  CCTGAGGTGCAGTGCTGCATCTCTGGTCAGTTGGGAGTCTGAGATGAAGCACTGTAGCTCAGG
10 CCTGAGGTGCAGTGCTGCATCTCTGGTCAGTTGGGAGTCTGAGATGAAGCACTGTAGCTCAGG
*****
```

## MiR-143 genomic locus (P5+P6)

Editing: sg145m2

```
wt CCTGAGGTGCAGTGCTGCATCTCTGGTCAGTTGGGAGTCTGAGATGAAGCACTGTAGCTCAGG
1  CCTGAGGTGCAGTGCTGCATCTCTGGTCAGTTGGGAGTCTGAGATGAAGCACTGTAGCTCAGG
2  CCTGAGGTGCAGTGCTGCATCTCTGGTCAGTTGGGAGTCTGAGATGAAGCACTGTAGCTCAGG
3  CCTGAGGTGCAGTGCTGCATCTCTGGTCAGTTGGGAGTCTGAGATGAAGCACTGTAGCTCAGG
4  CCTGAGGTGCAGTGCTGCATCTCTGGTCAGTTGGGAGTCTGAGATGAAGCACTGTAGCTCAGG
5  CCTGAGGTGCAGTGCTGCATCTCTGGTCAGTTGGGAGTCTGAGATGAAGCACTGTAGCTCAGG
6  CCTGAGGTGCAGTGCTGCATCTCTGGTCAGTTGGGAGTCTGAGATGAAGCACTGTAGCTCAGG
7  CCTGAGGTGCAGTGCTGCATCTCTGGTCAGTTGGGAGTCTGAGATGAAGCACTGTAGCTCAGG
8  CCTGAGGTGCAGTGCTGCATCTCTGGTCAGTTGGGAGTCTGAGATGAAGCACTGTAGCTCAGG
9  CCTGAGGTGCAGTGCTGCATCTCTGGTCAGTTGGGAGTCTGAGATGAAGCACTGTAGCTCAGG
10 CCTGAGGTGCAGTGCTGCATCTCTGGTCAGTTGGGAGTCTGAGATGAAGCACTGTAGCTCAGG
*****
```

**Supplementary Figure S11. Clustal alignment of Sanger sequencing of the miR-143 stem loop locus following sg145m1 and sg145m2 editing in VSMCs.** Wt: unedited cells, 1-10 randomly picked individual colonies harboring genomic PCR amplicons from edited VSMCs. P5, P6: Genomic PCR primers.

# Supplementary Figure S12

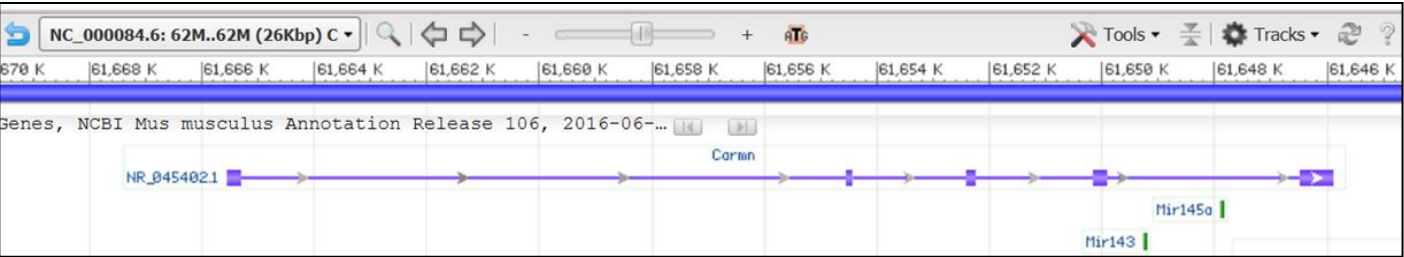

**Supplementary Figure S12. Genomic organization of the Carmn locus.** Snapshot obtained from NCBI database (<https://www.ncbi.nlm.nih.gov/gene/328968>) depicting the genomic locus of Carmn (cardiac mesoderm enhancer-associated non-coding RNA) and miR-143~145 cluster.

# Supplementary Figure S13

## A CLUSTAL W (1.83) multiple sequence alignment

```

miR-17      CAAAGUGCUUAC-AGUGCA--GGUAG
miR-18a     UAAGGUGCAUCU-AGUGCA--GAUAG
miR-19a     U---GUGCAAUUCUAUGCAAAACUGA
miR-19b     U---GUGCAAUCCAUGCAAAACUGA
miR-20a     UAAAGUGCUUAAU-AGUGCA--GGUAG
miR-92a     UAUU--GCACUU-GUCCCG--GCCUG

```

\*\*                      \*

## B

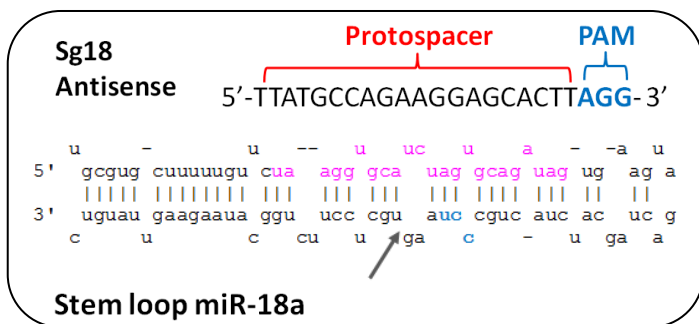

## C

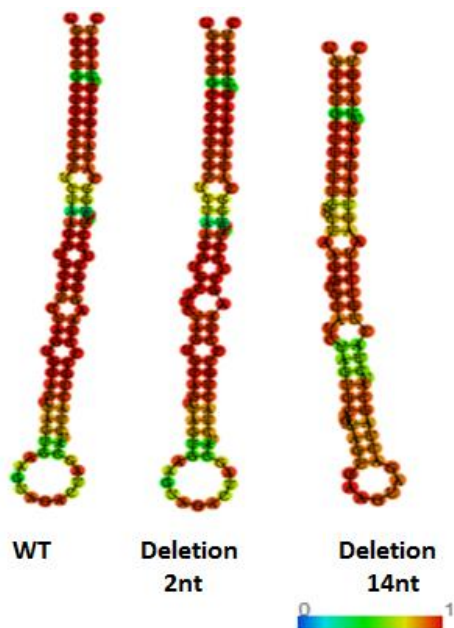

**Supplementary Figure S13. A. Sequence Alignment.** The T-Coffee multiple sequence alignment program was used to compare the miRNAs residing in the mouse miR-17~92 cluster. **B. Schematic representation of sg18.** The DNA sequence corresponding to the transcript annotated in miRBase v21 as stem loop miRNA was used as input sequence to the CRISPR Design tool. PAM sequence is highlighted in blue. The mature miRNA sequence is highlighted in purple and arrow indicated the site of mutations induced by random indels following editing of the genomic locus in mutant cells. **C. Minimum free energy structure of the miR-18a stem loop as assessed by the structure prediction software RNAfold.** The base-pairing probability, as indication of structural remodelling or dynamics, was used for color-coding.

# Supplementary Figure S14

## MiR-17 genomic locus (P9+P10)

Editing: sg18

```
wt  GT CAGAATAATGTCAAAGTGCTTACAGTGCAGGTAGT GATGTGTGCATCTACTGCAGT GAGGGCACTTGTAGCATTATGCTGAC
1   GT CAGAATAATGTCAAAGTGCTTACAGTGCAGGTAGT GATGTGTGCATCTACTGCAGT GAGGGCACTTGTAGCATTATGCTGAC
2   GT CAGAATAATGTCAAAGTGCTTACAGTGCAGGTAGT GATGTGTGCATCTACTGCAGT GAGGGCACTTGTAGCATTATGCTGAC
3   GT CAGAATAATGTCAAAGTGCTTACAGTGCAGGTAGT GATGTGTGCATCTACTGCAGT GAGGGCACTTGTAGCATTATGCTGAC
4   GT CAGAATAATGTCAAAGTGCTTACAGTGCAGGTAGT GATGTGTGCATCTACTGCAGT GAGGGCACTTGTAGCATTATGCTGAC
5   GT CAGAATAATGTCAAAGTGCTTACAGTGCAGGTAGT GATGTGTGCATCTACTGCAGT GAGGGCACTTGTAGCATTATGCTGAC
6   GT CAGAATAATGTCAAAGTGCTTACAGTGCAGGTAGT GATGTGTGCATCTACTGCAGT GAGGGCACTTGTAGCATTATGCTGAC
7   GT CAGAATAATGTCAAAGTGCTTACAGTGCAGGTAGT GATGTGTGCATCTACTGCAGT GAGGGCACTTGTAGCATTATGCTGAC
8   GT CAGAATAATGTCAAAGTGCTTACAGTGCAGGTAGT GATGTGTGCATCTACTGCAGT GAGGGCACTTGTAGCATTATGCTGAC
*****
```

## MiR-19a genomic locus (P9+P10)

Editing: sg18

```
wt  GCAGCCCTCTGTTAGTTTTGCATAGTTGCACTACAAGAAGAATGTAGTTGTGCAAATCTATGCAAAACTGATGGTGGCCTGC
1   GCAGCCCTCTGTTAGTTTTGCATAGTTGCACTACAAGAAGAATGTAGTTGTGCAAATCTATGCAAAACTGATGGTGGCCTGC
2   GCAGCCCTCTGTTAGTTTTGCATAGTTGCACTACAAGAAGAATGTAGTTGTGCAAATCTATGCAAAACTGATGGTGGCCTGC
3   GCAGCCCTCTGTTAGTTTTGCATAGTTGCACTACAAGAAGAATGTAGTTGTGCAAATCTATGCAAAACTGATGGTGGCCTGC
4   GCAGCCCTCTGTTAGTTTTGCATAGTTGCACTACAAGAAGAATGTAGTTGTGCAAATCTATGCAAAACTGATGGTGGCCTGC
5   GCAGCCCTCTGTTAGTTTTGCATAGTTGCACTACAAGAAGAATGTAGTTGTGCAAATCTATGCAAAACTGATGGTGGCCTGC
6   GCAGCCCTCTGTTAGTTTTGCATAGTTGCACTACAAGAAGAATGTAGTTGTGCAAATCTATGCAAAACTGATGGTGGCCTGC
7   GCAGCCCTCTGTTAGTTTTGCATAGTTGCACTACAAGAAGAATGTAGTTGTGCAAATCTATGCAAAACTGATGGTGGCCTGC
8   GCAGCCCTCTGTTAGTTTTGCATAGTTGCACTACAAGAAGAATGTAGTTGTGCAAATCTATGCAAAACTGATGGTGGCCTGC
*****
```

## MiR-20a genomic locus (P9+P10)

Editing: sg18

```
wt  GTGTGATGTGACAGCTTCTGTAGCACTAAAGTGCTTATAGTGCAGGTAGTGTGTAGCCATCTACTGCATTACGAGCACTTAAAGTACTGCCAGCTGTAGAACTCCAG
1   GTGTGATGTGACAGCTTCTGTAGCACTAAAGTGCTTATAGTGCAGGTAGTGTGTAGCCATCTACTGCATTACGAGCACTTAAAGTACTGCCAGCTGTAGAACTCCAG
2   GTGTGATGTGACAGCTTCTGTAGCACTAAAGTGCTTATAGTGCAGGTAGTGTGTAGCCATCTACTGCATTACGAGCACTTAAAGTACTGCCAGCTGTAGAACTCCAG
3   GTGTGATGTGACAGCTTCTGTAGCACTAAAGTGCTTATAGTGCAGGTAGTGTGTAGCCATCTACTGCATTACGAGCACTTAAAGTACTGCCAGCTGTAGAACTCCAG
4   GTGTGATGTGACAGCTTCTGTAGCACTAAAGTGCTTATAGTGCAGGTAGTGTGTAGCCATCTACTGCATTACGAGCACTTAAAGTACTGCCAGCTGTAGAACTCCAG
5   GTGTGATGTGACAGCTTCTGTAGCACTAAAGTGCTTATAGTGCAGGTAGTGTGTAGCCATCTACTGCATTACGAGCACTTAAAGTACTGCCAGCTGTAGAACTCCAG
6   GTGTGATGTGACAGCTTCTGTAGCACTAAAGTGCTTATAGTGCAGGTAGTGTGTAGCCATCTACTGCATTACGAGCACTTAAAGTACTGCCAGCTGTAGAACTCCAG
7   GTGTGATGTGACAGCTTCTGTAGCACTAAAGTGCTTATAGTGCAGGTAGTGTGTAGCCATCTACTGCATTACGAGCACTTAAAGTACTGCCAGCTGTAGAACTCCAG
8   GTGTGATGTGACAGCTTCTGTAGCACTAAAGTGCTTATAGTGCAGGTAGTGTGTAGCCATCTACTGCATTACGAGCACTTAAAGTACTGCCAGCTGTAGAACTCCAG
9   GTGTGATGTGACAGCTTCTGTAGCACTAAAGTGCTTATAGTGCAGGTAGTGTGTAGCCATCTACTGCATTACGAGCACTTAAAGTACTGCCAGCTGTAGAACTCCAG
10  GTGTGATGTGACAGCTTCTGTAGCACTAAAGTGCTTATAGTGCAGGTAGTGTGTAGCCATCTACTGCATTACGAGCACTTAAAGTACTGCCAGCTGTAGAACTCCAG
*****
```

**Supplementary Figure S14. Clustal alignment of Sanger sequencing of miR-17, miR-19a and miR-20a stem loop loci following sg18 editing in VSMCs.** Wt: unedited cells, 1-10 randomly picked individual colonies harboring genomic PCR amplicons from edited VSMCs. P9, P10: Genomic PCR primers.

# Supplementary Figure S15

## A CLUSTAL W (1.83) multiple sequence alignment

```
miR-106b    UAAAGUGCUGA-CAGUGCAG--AU
miR-25     CAUUGCACUUGUCUCGGUCU--GA
miR-93     CAAAGUGCUGU-UCGUGCAGGUAG
            *  *  **          *
```

## B

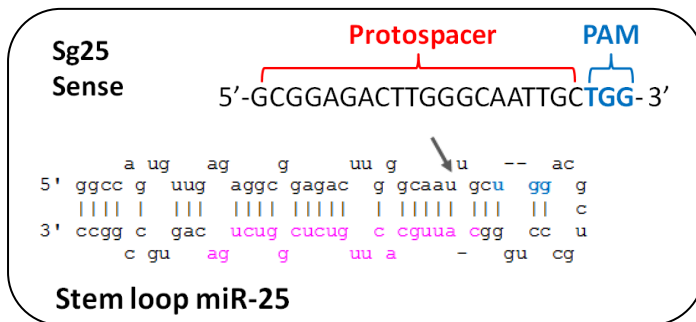

## C

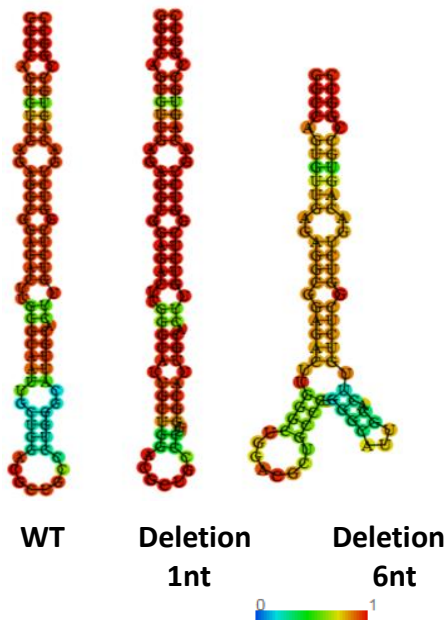

**Supplementary Figure S15. A. Sequence Alignment.** The T-Coffee multiple sequence alignment program was used to compare the miRNAs residing in the mouse miR-106b~25 cluster. **B. Schematic representation of sg25.** The DNA sequence corresponding to the transcript annotated in miRBase v21 as stem loop miRNA was used as input sequence to the CRISPR Design tool. PAM sequence is highlighted in blue. The mature miRNA sequence is highlighted in purple and the arrow indicates the site of mutations induced by random indels following editing of the genomic locus in mutant cells. **C. Minimum free energy structure of the miR-25 stem loop as assessed by the structure prediction software RNAfold.** The base-pairing probability, as an indication of structural remodelling or dynamics, was used for color-coding.



# Supplementary Figure S16

## MiR-93 genomic locus (P11+P12)

Editing: sg25

```
wt  AGTCATGGGGGCTCCAAAGTGCTGTTCTGTCAGGTAGTGTAAATTACCTGACCTACTGCTGAGCTAGCACTTCCCGAGCCCCCAGGACA
1   AGTCATGGGGGCTCCAAAGTGCTGTTCTGTCAGGTAGTGTAAATTACCTGACCTACTGCTGAGCTAGCACTTCCCGAGCCCCCAGGACA
2   AGTCATGGGGGCTCCAAAGTGCTGTTCTGTCAGGTAGTGTAAATTACCTGACCTACTGCTGAGCTAGCACTTCCCGAGCCCCCAGGACA
3   AGTCATGGGGGCTCCAAAGTGCTGTTCTGTCAGGTAGTGTAAATTACCTGACCTACTGCTGAGCTAGCACTTCCCGAGCCCCCAGGACA
4   AGTCATGGGGGCTCCAAAGTGCTGTTCTGTCAGGTAGTGTAAATTACCTGACCTACTGCTGAGCTAGCACTTCCCGAGCCCCCAGGACA
5   AGTCATGGGGGCTCCAAAGTGCTGTTCTGTCAGGTAGTGTAAATTACCTGACCTACTGCTGAGCTAGCACTTCCCGAGCCCCCAGGACA
6   AGTCATGGGGGCTCCAAAGTGCTGTTCTGTCAGGTAGTGTAAATTACCTGACCTACTGCTGAGCTAGCACTTCCCGAGCCCCCAGGACA
7   AGTCATGGGGGCTCCAAAGTGCTGTTCTGTCAGGTAGTGTAAATTACCTGACCTACTGCTGAGCTAGCACTTCCCGAGCCCCCAGGACA
8   AGTCATGGGGGCTCCAAAGTGCTGTTCTGTCAGGTAGTGTAAATTACCTGACCTACTGCTGAGCTAGCACTTCCCGAGCCCCCAGGACA
9   AGTCATGGGGGCTCCAAAGTGCTGTTCTGTCAGGTAGTGTAAATTACCTGACCTACTGCTGAGCTAGCACTTCCCGAGCCCCCAGGACA
10  AGTCATGG- GGCTCCAAAGTGCTGTTCTGTCAGGTAGTGTAAATTACCTGACCTACTGCTGAGCTAGCACTTCCCGAGCCCCCAGGACA
*****
```

## MiR-106b genomic locus (P11+P12)

Editing: sg25

```
wt  CCTGCTGGGACTAAAGTGCTGACAGTGCAGATAGTGGTCCTCTCTGTGCTACCGCACTGTGGGTACTTGCTGCTCCAGCAGG
1   CCTGCTGGGACTAAAGTGCTGACAGTGCAGATAGTGGTCCTCTCTGTGCTACCGCACTGTGGGTACTTGCTGCTCCAGCAGG
2   CCTGCTGGGACTAAAGTGCTGACAGTGCAGATAGTGGTCCTCTCTGTGCTACCGCACTGTGGGTACTTGCTGCTCCAGCAGG
3   CCTGCTGGGACTAAAGTGCTGACAGTGCAGATAGTGGTCCTCTCTGTGCTACCGCACTGTGGGTACTTGCTGCTCCAGCAGG
4   CCTGCTGGGACTAAAGTGCTGACAGTGCAGATAGTGGTCCTCTCTGTGCTACCGCACTGTGGGTACTTGCTGCTCCAGCAGG
5   CCTGCTGGGACTAAAGTGCTGACAGTGCAGATAGTGGTCCTCTCTGTGCTACCGCACTGTGGGTACTTGCTGCTCCAGCAGG
6   CCTGCTGGGACTAAAGTGCTGACAGTGCAGATAGTGGTCCTCTCTGTGCTACCGCACTGTGGGTACTTGCTGCTCCAGCAGG
7   CCTGCTGGGACTAAAGTGCTGACAGTGCAGATAGTGGTCCTCTCTGTGCTACCGCACTGTGGGTACTTGCTGCTCCAGCAGG
8   CCTGCTGGGACTAAAGTGCTGACAGTGCAGATAGTGGTCCTCTCTGTGCTACCGCACTGTGGGTACTTGCTGCTCCAGCAGG
9   CCTGCTGGGACTAAAGTGCTGACAGTGCAGATAGTGGTCCTCTCTGTGCTACCGCACTGTGGGTACTTGCTGCTCCAGCAGG
10  CCTGCTGGGACTAAAGTGCTGACAGTGCAGATAGTGGTCCTCTCTGTGCTACCGCACTGTGGGTACTTGCTGCTCCAGCAGG
*****
```

**Supplementary Figure S16. Clustal alignment of Sanger sequencing of miR-93 and miR-106b stem loop loci following sg25 editing in VSMCs.** Wt: unedited cells, 1-10 randomly picked individual colonies harboring genomic PCR amplicons from edited VSMCs. P11, P12: Genomic PCR primers.

# Supplementary Table 1.

| miRNA [miRNA family] | MiRBase stem loop accession number | Coordinates (GRCm38)           | Mature miRNA Sequence    | Cluster      |
|----------------------|------------------------------------|--------------------------------|--------------------------|--------------|
| miR-15a [miR-15]     | MI0000564                          | chr14: 61632027-61632110 [-]   | UAGCAGCACAUAAUGGUUUGUG   | miR-15a~16-1 |
| miR-16-1 [miR-15]    | MI0000565                          | chr14: 61631880-61631972 [-]   | UAGCAGCACGUAUUUUGGCG     | miR-15a~16-1 |
| miR-15b [miR-15]     | MI0000140                          | chr3: 69009772-69009835 [+]    | UAGCAGCACAUCAUGGUUUACA   | miR-15b~16-2 |
| miR-16-2 [miR-15]    | MI0000566                          | chr3: 69009902-69009996 [+]    | UAGCAGCACGUAUUUUGGCG     | miR-15b~16-2 |
| miR-195 [miR-15]     | MI0000237                          | chr11: 70235042-70235135 [+]   | UAGCAGCACAGAAUUUGGC      | miR-497~195  |
| miR-497a [miR-15]    | MI0004636                          | chr11: 70234717-70234800 [+]   | CAGCAGCACACUGUGUUUGUA    | miR-497~195  |
| miR-497b [miR-140]   | MI0026030                          | chr11: 70234692-70234816 [-]   | CACCACAGUGUGUUUGGACGUGG  | miR-497~195  |
| miR-143 [miR-143]    | MI0000257                          | chr18: 61649196-61649258 [-]   | GGUGCAGUGCUGCAUCUCUGG    | miR-143~145  |
| miR-145 [miR-145]    | MI0000169                          | chr18: 61647825-61647894 [-]   | GUCCAGUUUCCAGGAAUCCCU    | miR-143~145  |
| miR-17 [miR-17]      | MI0000687                          | chr14: 115043671-115043754 [+] | CAAAGUGC UUACAGUGCAGGUAG | miR-17~92    |
| miR-18a [miR-18]     | MI0000567                          | chr14: 115043851-115043946 [+] | UAAGGUGCAUCUAGUGCAGAUAG  | miR-17~92    |
| miR-19a [miR-19]     | MI0000688                          | chr14: 115044000-115044081 [+] | UGUGCAAUUCUAUGCAAACUGA   | miR-17~92    |
| miR-20a [miR-17]     | MI0000568                          | chr14: 115044157-115044263 [+] | UAAAGUGC UUUAUGUGCAGGUAG | miR-17~92    |
| miR-19b-1 [miR-19]   | MI0000718                          | chr14: 115044305-115044391 [+] | UGUGCAAUUCUAUGCAAACUGA   | miR-17~92    |
| miR-92a-1 [miR-25]   | MI0000719                          | chr14: 115044427-115044506 [+] | UAUUGCACUUGUCCCGGCCUG    | miR-17~92    |
| miR-106b [miR-17]    | MI0000407                          | chr5: 138165737-138165818 [-]  | UAAAGUGCUGACAGUGCAGAU    | miR-106b~25  |
| miR-93 [miR-17]      | MI0000581                          | chr5: 138165523-138165610 [-]  | CAAAGUGCUGUUCGUGCAGGUAG  | miR-106b~25  |
| miR-25 [miR-25]      | MI0000689                          | chr5: 138165321-138165404 [-]  | CAUUGCACUUGUCUCGGUCUGA   | miR-106b~25  |
| miR-106a [miR-17]    | MI0000406                          | chrX: 52742503-52742567 [-]    | CAAAGUGC UAACAGUGCAGGUAG | miR-106a~363 |
| miR-18b [miR-18]     | MI0005483                          | chrX: 52742331-52742413 [-]    | UAAGGUGCAUCUAGUGCUGUUAG  | miR-106a~363 |
| miR-20b [miR-17]     | MI0003536                          | chrX: 52742113-52742192 [-]    | CAAAGUGCUCAUAGUGCAGGUAG  | miR-106a~363 |
| miR-19b-2 [miR-19]   | MI0000546                          | chrX: 52741983-52742066 [-]    | UGUGCAAUUCUAUGCAAACUGA   | miR-106a~363 |
| miR-92a-2 [miR-25]   | MI0000580                          | chrX: 52741838-52741928 [-]    | UAUUGCACUUGUCCCGGCCUG    | miR-106a~363 |
| miR-363 [miR-25]     | MI0000765                          | chrX: 52741693-52741767 [-]    | CAGGUGGAACACGAUGCAAUUU   | miR-106a~363 |

**Supplementary Table 1. Details of miRNA clusters and miRNA families.** Data on miRNA clusters were obtained from the MiRBase database. Data on miRNA families were obtained from the Targetscan programme.

## Supplementary Table 2.

| Assay                  | Primer         | Sequence (5' to 3')                     | Coordinates (GRCm38)            |
|------------------------|----------------|-----------------------------------------|---------------------------------|
| IVT                    | F 195m2        | TAATACGACTCACTATAGGTGGAGCAGCACAGCCAATAT | chr11: 70,235,100-70,235,120    |
| IVT                    | R 195m2        | TTCTAGCTCTAAAACATATTGGCTGTGCTGCTCCAC    |                                 |
| IVT                    | F 195m3        | TAATACGACTCACTATAGCTCTAGCAGCACAGAAATAT  | chr11: 70,235,059-70,235,079    |
| IVT                    | R 195m3        | TTCTAGCTCTAAAACATATTTCTGTGCTGCTAGAG     |                                 |
| IVT                    | F 145m1        | TAATACGACTCACTATAGAGGGGCGTGGCACGTGCTGA  | chr18: 61,647,919-61,647,939    |
| IVT                    | R 145m1        | TTCTAGCTCTAAAACCTCAGCACGTGCCACGCCCT     |                                 |
| IVT                    | F 145m2        | TAATACGACTCACTATAGGATGCTAAGATGGGGATTCC  | chr18: 61,647,840-61,647,860    |
| IVT                    | R 145m2        | TTCTAGCTCTAAAACGGAATCCCCATCTTAGCATC     |                                 |
| IVT                    | F 18a          | TAATACGACTCACTATAGTTATGCCAGAAGGAGCACTT  | chr14: 115,043,915-115,043,935  |
| IVT                    | R 18a          | TTCTAGCTCTAAAACAAGTGCTCCTTCTGGCATAA     |                                 |
| IVT                    | F 25           | TAATACGACTCACTATAGGCGGAGACTTGGGCAATTGC  | chr5: 138,165,367-138,165,387   |
| IVT                    | R 25           | TTCTAGCTCTAAAACGCAATTGCCCAAGTCTCCGC     |                                 |
| <b>GENOMIC PCR</b>     | MiR-195 F (P1) | CACACACACACCGTCTAGGG                    | chr11: 70,234,878-70,235,407    |
| <b>GENOMIC PCR</b>     | MiR-195 R (P2) | CTGAGCCTTCCACCTCTGAC                    |                                 |
| <b>GENOMIC PCR</b>     | MiR-497 F (P3) | CCTGTGTCTTCCAGCATTTCTC                  | chr11: 70,234,360- 70,234,977   |
| <b>GENOMIC PCR</b>     | MiR-497 R (P4) | GTATCAGACAACCTGGGGGTT                   |                                 |
| <b>GENOMIC PCR</b>     | MiR-143 F (P5) | GTGCTGCGTGCATAAAGAGA                    | chr18: 61,649,137- 61,649,567   |
| <b>GENOMIC PCR</b>     | MiR-143 R (P6) | GCTATCCCATGCCAACACTT                    |                                 |
| <b>GENOMIC PCR</b>     | MiR-145 F (P7) | CTTTCCAAGCCACTCAAAGC                    | chr18: 61,647,566- 61,648,054   |
| <b>GENOMIC PCR</b>     | MiR-145 R (P8) | GGAGCCGTCTCATAGTCTGG                    |                                 |
| <b>GENOMIC PCR</b>     | MiR-18 F (P9)  | CCTGGTCAATGTGAGGCTTT                    | chr14: 115,043,309- 115,044,386 |
| <b>GENOMIC PCR</b>     | MiR-18 R (P10) | CCACAGTCAGTTTTGCATGG                    |                                 |
| <b>GENOMIC PCR</b>     | MiR-25 F (P11) | TTCTCCGACTTTCCACTGCT                    | chr5: 138,164,956-138,165,932   |
| <b>GENOMIC PCR</b>     | MiR-25 R (P12) | GCCACAAACAGTAGCAGCAA                    |                                 |
| <b>Gene expression</b> | Carmn F        | AATAGACTGGGCCTCCACCT                    | chr18: 61,651,154- 61,651,267   |
| <b>Gene expression</b> | Carmn R        | GTTCTCTCTGGGGCTCTTC                     |                                 |

**Supplementary Table 2. Primer sequences.** Genomic primers were labelled P1-P12, as depicted on the genomic loci schematics. IVT: *in vitro* transcription.

## Supplementary Table 3.

| Assay       | GENE             | OFFTARGET Sequence                             | Mismatches      | Primer Sequence (5' to 3') |                           | Locus           |
|-------------|------------------|------------------------------------------------|-----------------|----------------------------|---------------------------|-----------------|
| GENOMIC PCR | OFFTARGET1 195m2 | AGGAGCAG <b>T</b> G CAGCCAATAT                 | 3MMs [1:9:10]   | OFT1 195m2 F               | GTGCTGGGATTACAGGCATT      | chr17:-3133199  |
| GENOMIC PCR |                  |                                                |                 | OFT1 195m2 R               | TCCTTGGAAATGAGAGGGCTA     |                 |
| GENOMIC PCR | OFFTARGET2 195m2 | AGGAGCA <b>A</b> CACAGCCA <b>T</b> TAT         | 3MMs [1:8:17]   | OFT2 195m2 F               | GCCCCAGAGTGTGTGAAAGT      | chr8:-10246601  |
| GENOMIC PCR |                  |                                                |                 | OFT2 195m2 R               | TCAAGCCTCTGAATGCACAC      |                 |
| GENOMIC PCR | OFFTARGET3 195m2 | ATGAGCAGCACAGC <b>G</b> AATAT                  | 3MMs [1:2:15]   | OFT3 195m2 F               | TCCACATGGACTGCAGTGTT      | chr14:-7377792  |
| GENOMIC PCR |                  |                                                |                 | OFT3 195m2 R               | GCTCCTGTGTT CAGGTGTGA     |                 |
| GENOMIC PCR | OFFTARGET4 195m2 | TGGAGCA <b>C</b> AAAAGCCAATAT                  | 3MMs [8:9:11]   | OFT4 195m2 F               | ATTCTCGGGGAAATCCATC       | chrX:+72165663  |
| GENOMIC PCR |                  |                                                |                 | OFT4 195m2 R               | TTGCACTGCTGCACACAAA       |                 |
| GENOMIC PCR | OFFTARGET5 195m2 | TGGAGCA <b>T</b> CACAGCCA <b>A</b> CAT         | 2MMs [8:17]     | OFT5 195m2 F               | TATCCTCTCGCCTTTGCACT      | chr2:+24952183  |
| GENOMIC PCR |                  |                                                |                 | OFT5 195m2 R               | GCAGAGTGCATCTGTGGAA       |                 |
| GENOMIC PCR | OFFTARGET6 195m2 | TG <b>C</b> AGCAGCA <b>A</b> AGCCA <b>T</b> AT | 3MMs [3:11:17]  | OFT6 195m2 F               | CGACTTGCAATCACATGGAG      | chr13:+35216430 |
| GENOMIC PCR |                  |                                                |                 | OFT6 195m2 R               | CACCCACTCGGGACCTACTA      |                 |
| GENOMIC PCR | OFFTARGET7 195m2 | AGG <b>A</b> TTAGCTCAGCCAATAT                  | 4MMs [1:5:6:10] | OFT7 195m2 F               | AGTGCTGGGCATAGGACAAC      | chr2:-91834510  |
| GENOMIC PCR |                  |                                                |                 | OFT7 195m2 R               | CTGCTCTTCCAAAGGTCCTG      |                 |
| GENOMIC PCR | OFFTARGET1 195m3 | CT <b>G</b> TAGCA <b>A</b> CACAGAAATAT         | 2MMs [3:9]      | OFT1 195m3 F               | TGGGTTTGAAGGTCCTGAAG      | chr1:-196773757 |
| GENOMIC PCR |                  |                                                |                 | OFT1 195m3 R               | ACATCCTTGTGGCCATGAT       |                 |
| GENOMIC PCR | OFFTARGET2 195m3 | CTCTAGCAG <b>G</b> CAGAAATA <b>A</b>           | 2MMs [10:20]    | OFT2 195m3 F               | TCTGCCTCAGCTTCCAAGT       | chr4:+62834971  |
| GENOMIC PCR |                  |                                                |                 | OFT2 195m3 R               | TGCTCAAGCTACCCCACTG       |                 |
| GENOMIC PCR | OFFTARGET3 195m3 | <b>T</b> TAAAGCAGCACAGAAATAT                   | 3MMs [1:3:4]    | OFT3 195m3 F               | TCCCCTGGACTTTGACATTC      | chr3:-154152635 |
| GENOMIC PCR |                  |                                                |                 | OFT3 195m3 R               | AATGCCCTTCCCCAATAATC      |                 |
| GENOMIC PCR | OFFTARGET4 195m3 | AGCTAGCAG <b>C</b> T CAGAAATAT                 | 3MMs [1:2:11]   | OFT4 195m3 F               | TGGAGAAGGAGGAGGTCTGA      | chr15:-76275970 |
| GENOMIC PCR |                  |                                                |                 | OFT4 195m3 R               | GTGCCTGAACTCTGTGGTGA      |                 |
| GENOMIC PCR | OFFTARGET5 195m3 | <b>G</b> TCTA <b>C</b> CAGAACAGAAATAT          | 3MMs [1:6:10]   | OFT5 195m3 F               | CCCATTGTGATGGAAAGATT      | chr12:+31442719 |
| GENOMIC PCR |                  |                                                |                 | OFT5 195m3 R               | TGAAATGGGGAGTGTGTGA       |                 |
| GENOMIC PCR | OFFTARGET6 195m3 | CTCT <b>G</b> T <b>C</b> TGCACAGAAATAT         | 3MMs [5:6:8]    | OFT6 195m3 F               | GGGAGACTATTGTGCATGATTTATT | chr9:-22593762  |
| GENOMIC PCR |                  |                                                |                 | OFT6 195m3 R               | GGTATTACTGTTTAGGCCACTCT   |                 |

**Supplementary Table 3. OFFTARGET Primer sequences.** Genomic primers for putative OFFTARGET sites of editing for sg195 m2 and sg195 m3 as predicted by the CRISPR Design tool (Zhang lab, MIT) or the CRISPR Finder (Wellcome Trust Sanger Institute- highlighted in blue). The mismatches are shown in red. OFT: OFFTARGET.

## **ONLINE SUPPLEMENT**

### **CRISPR/Cas9 editing reveals novel mechanisms of clustered microRNA regulation and function**

Lazaros Lataniotis<sup>1</sup>, Andreas Albrecht<sup>2</sup>, Fatma O. Kok<sup>3</sup>, Clinton A.L. Monfries<sup>4</sup>, Lorena Benedetti<sup>5</sup>, Nathan D. Lawson<sup>3</sup>, Simon M. Hughes<sup>4</sup>, Kathleen Steinhofel<sup>6</sup>, Manuel Mayr<sup>1</sup> and Anna Zampetaki<sup>1</sup>

1 King's British Heart Foundation Centre, King's College London, UK.

2 Middlesex University, School of Science and Technology, London, UK.

3 University of Massachusetts Medical School, Department of Molecular, Cell, and Cancer Biology, Worcester, USA.

4 King's College London, Randall Division, London, UK.

5 King's College London, Division of Cancer Studies, London, UK.

6 King's College London, Informatics Department, London, UK.

## **UNCROPPED GEL IMAGES**

**Figure 1**

**Fig1b**

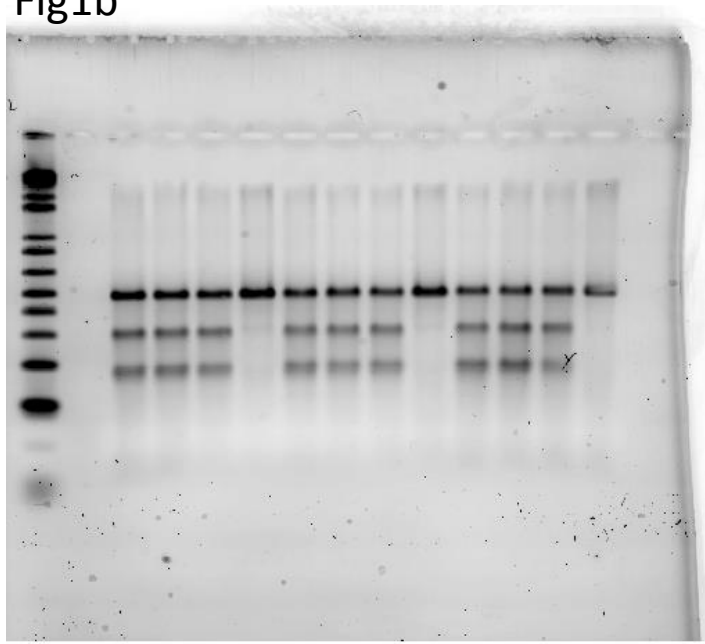

**Fig1c**

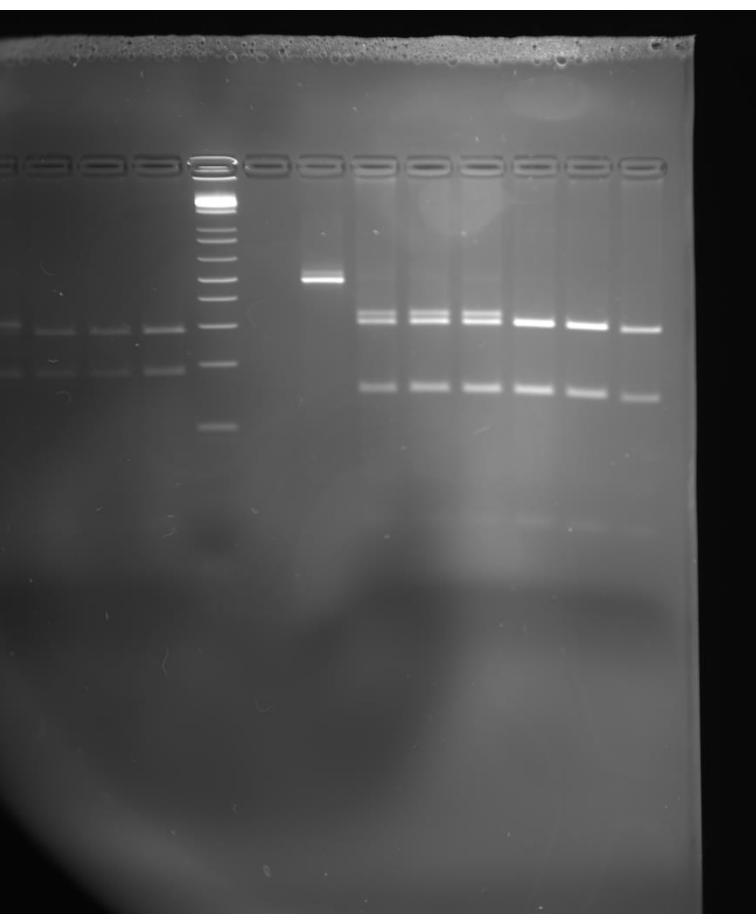

**Fig1f**

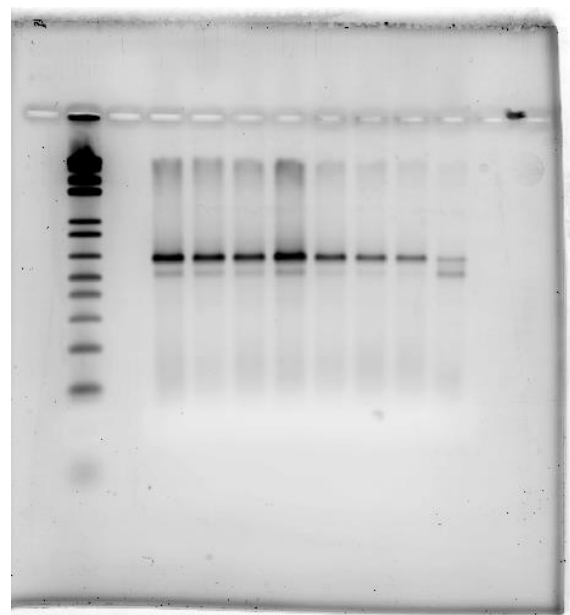

**Figure 3**

**Fig3b**

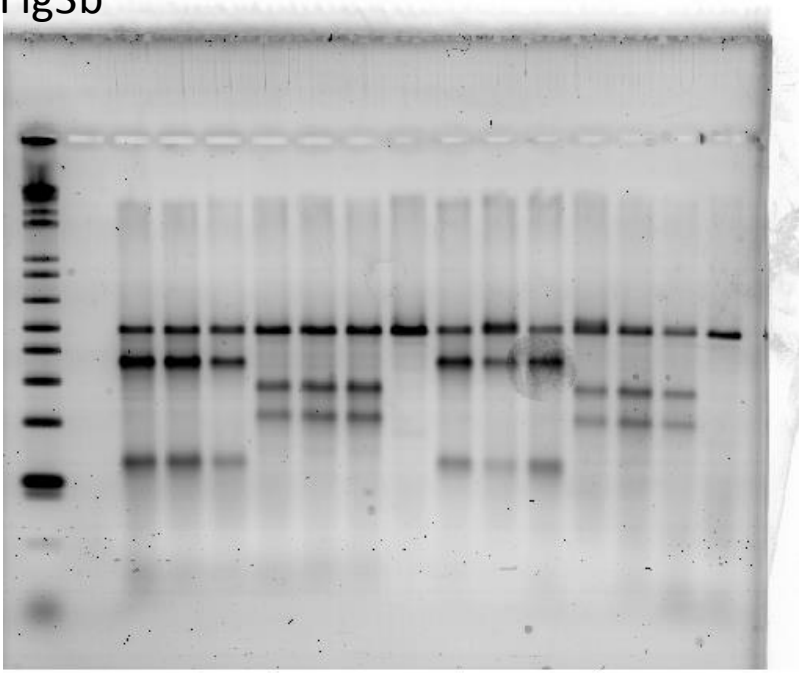

**Fig3c**

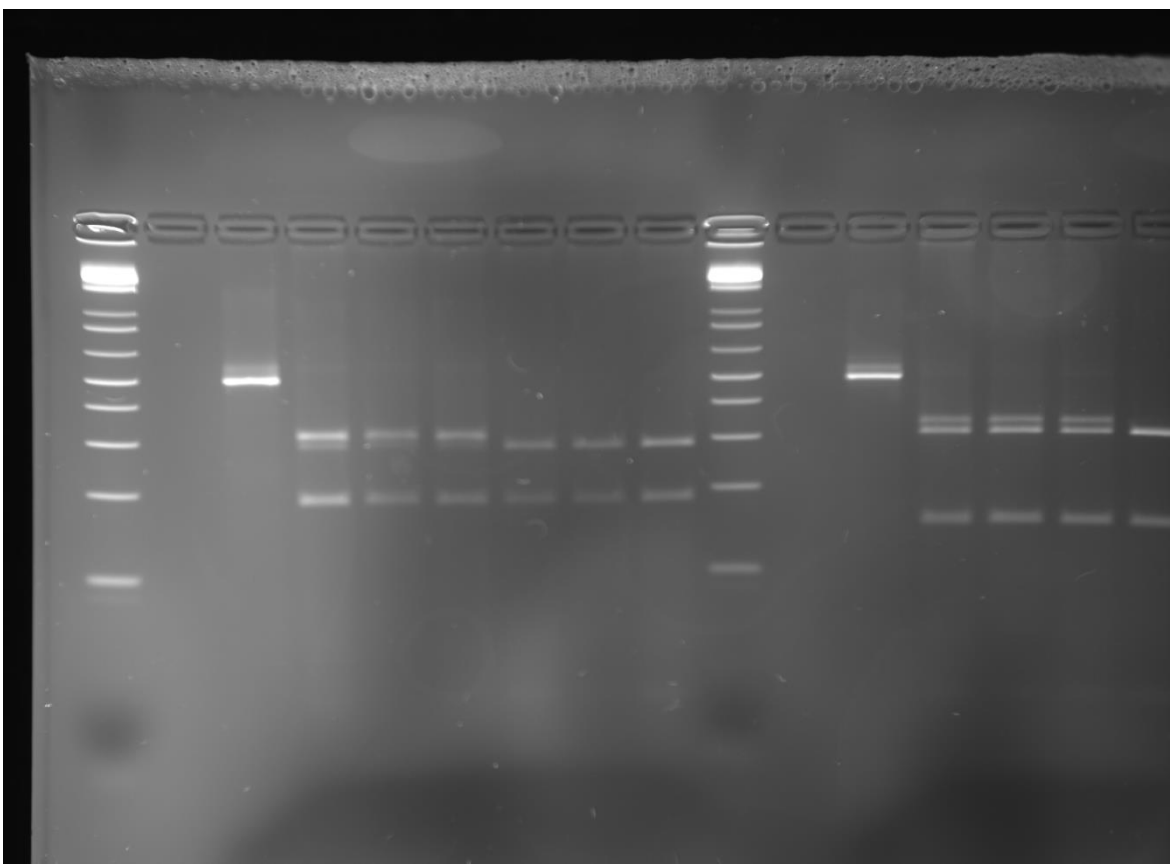

**Figure 4**

**Fig4b**

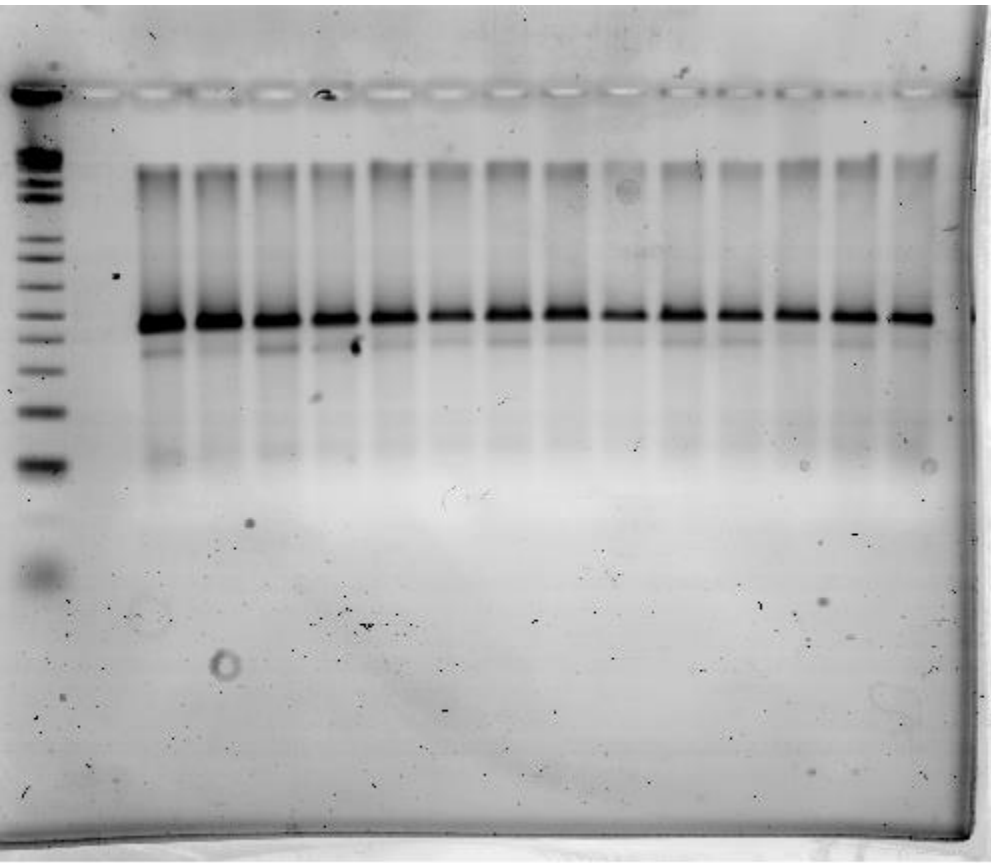



Figure 5

Fig5b

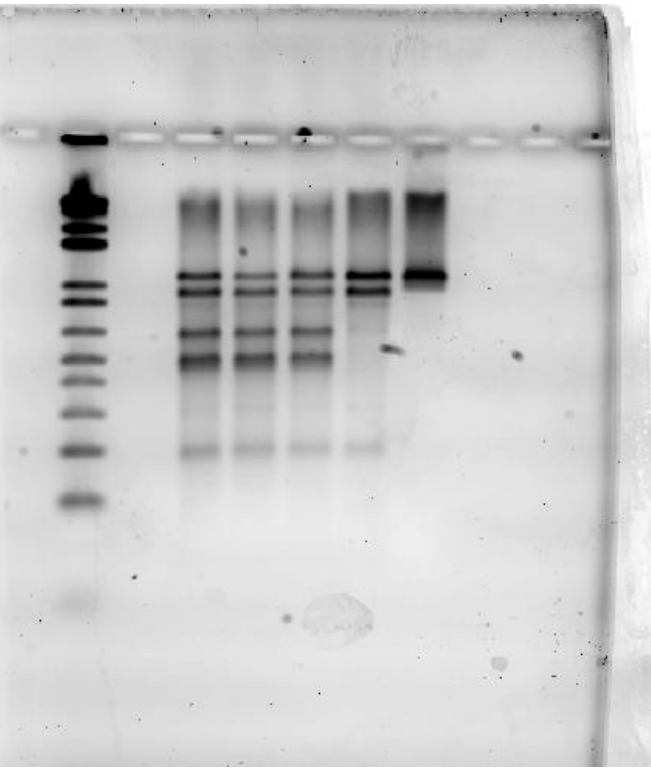

Fig5c

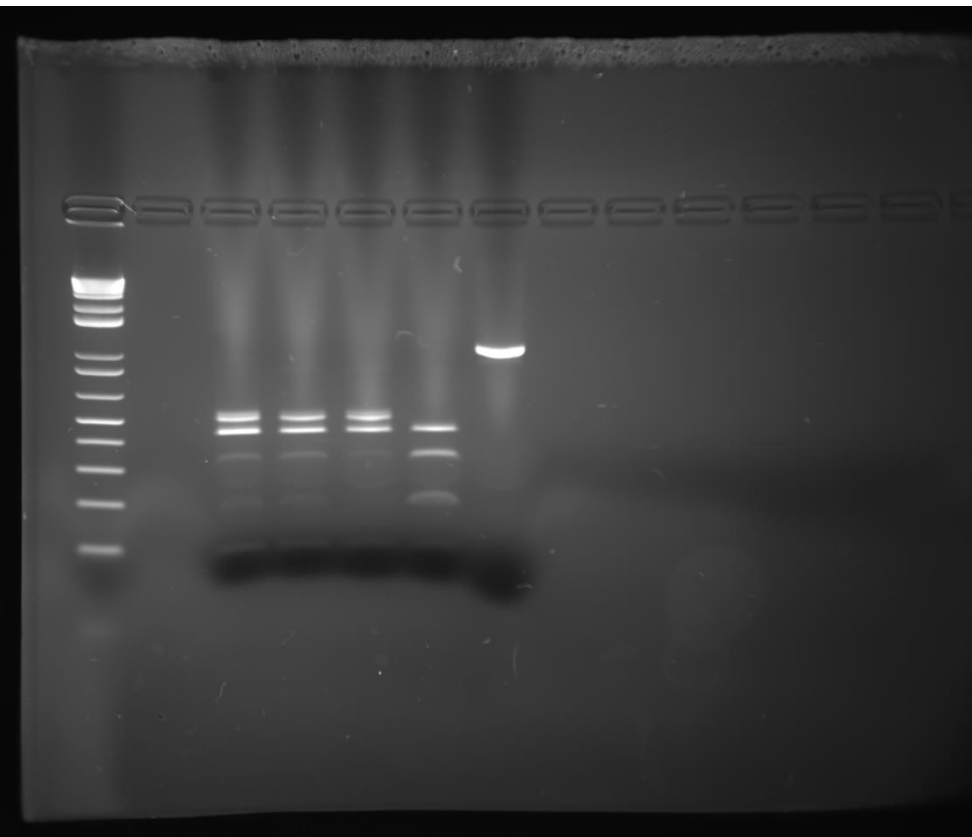

**Figure 6**

Fig6b

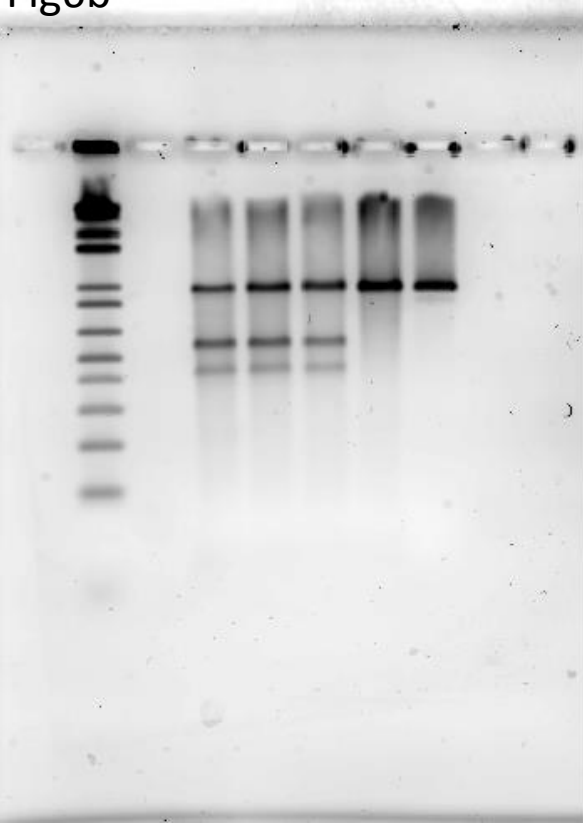

Fig6c

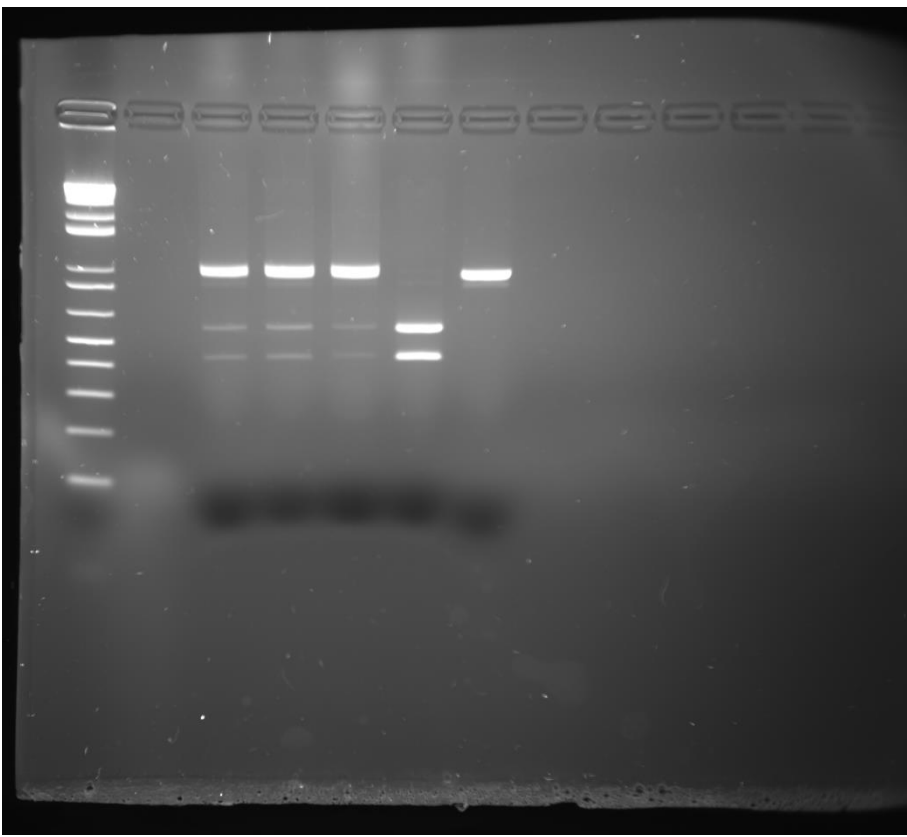

### Supplementary Figure 3

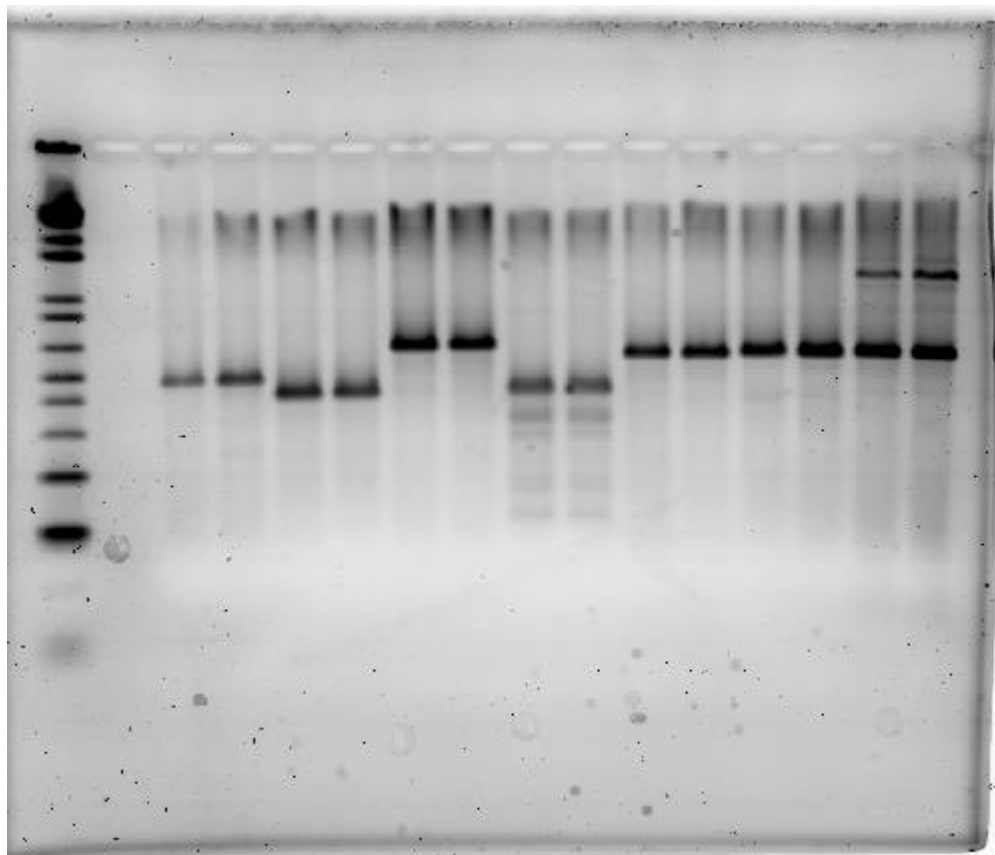

Supplementary Figure 4

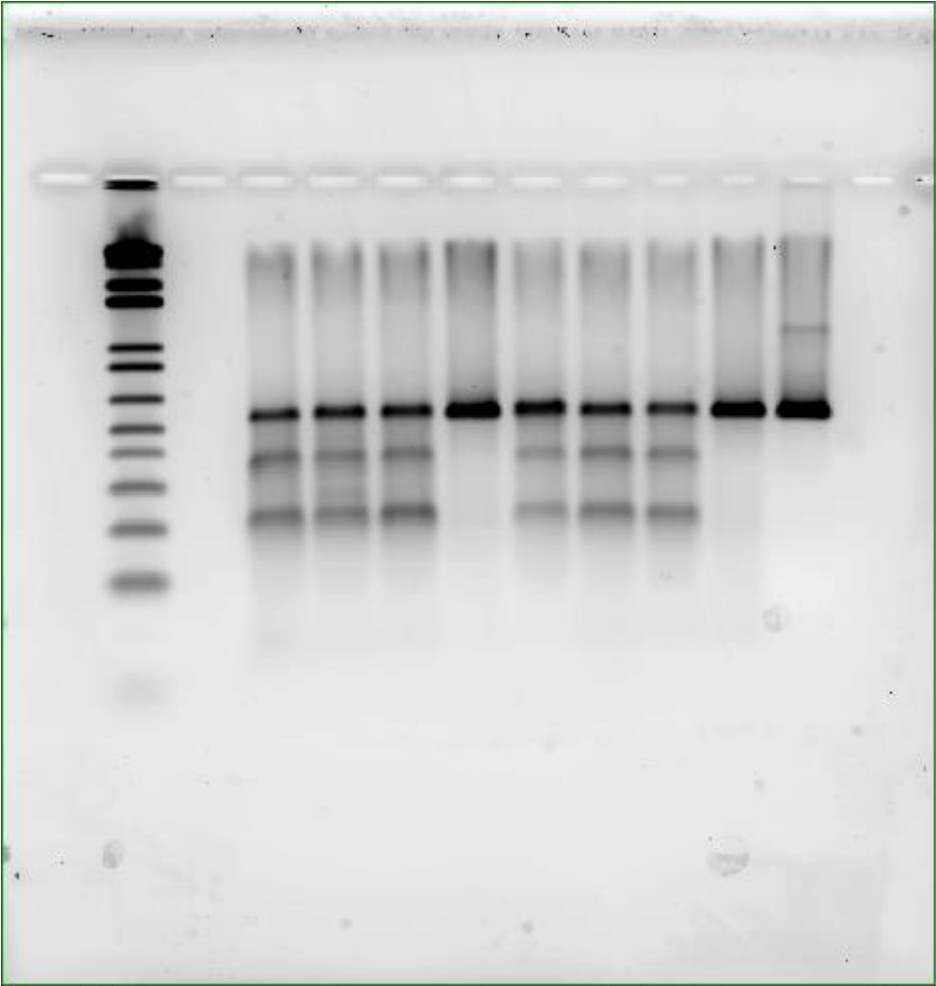

Supplementary Figure 5

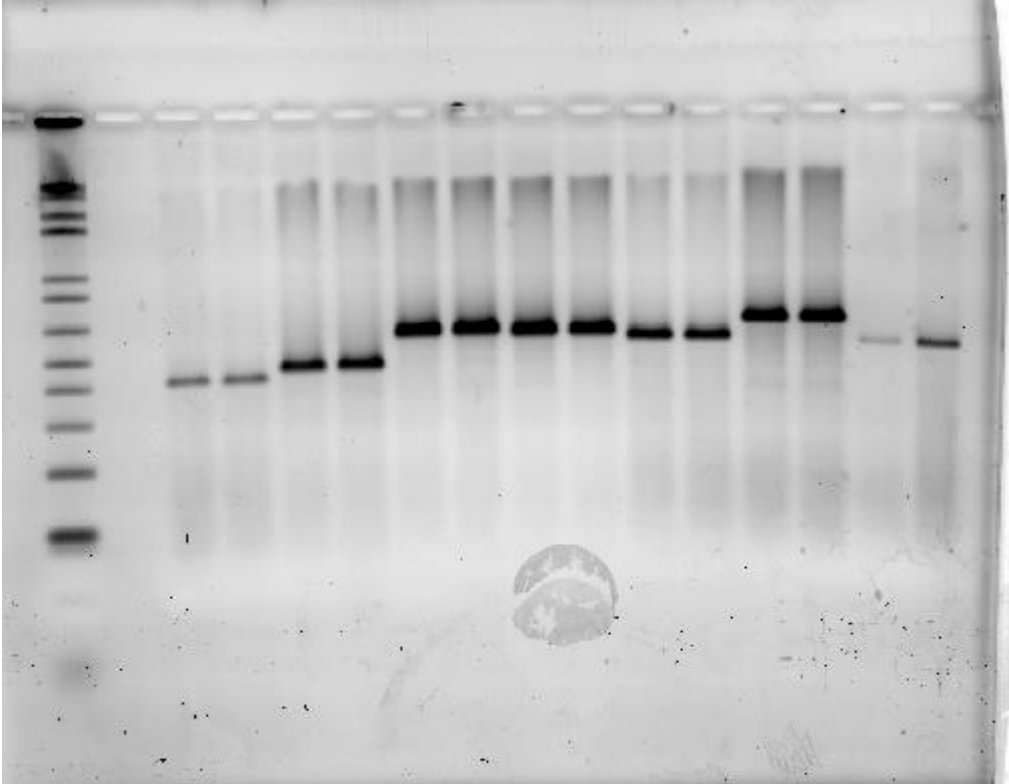

Supplement: 41598_2017_9268_MOESM1_ESM.pdf [file 41598_2017_9268_MOESM1_ESM.pdf]
